# Supplementary material for: N7-methylguanosine-related miRNAs predict hepatocellular carcinoma prognosis and immune therapy
Source: Aging (Albany NY). 2023 Nov 3;15(21):12192–208. doi: 10.18632/aging.205172 (PMC10683595; doi:10.18632/aging.205172)
Supplement: Supplementary Table 1 [file aging-15-205172-s001.xls]

Supplementary Table 1. miRNAs targeting WDR4 or METTL1.
gene	miRNA
METTL1	hsa-miR-8832
METTL1	hsa-miR-8880
METTL1	hsa-miR-7-5p
METTL1	hsa-miR-7213-5p
METTL1	hsa-miR-1264
METTL1	hsa-miR-5710
METTL1	hsa-miR-150-5p
METTL1	hsa-miR-6332
METTL1	hsa-miR-30
METTL1	hsa-miR-18a-3p
METTL1	hsa-miR-4267
METTL1	hsa-miR-8823
METTL1	hsa-miR-7218-5p
METTL1	hsa-miR-4318
METTL1	hsa-miR-466q
METTL1	hsa-miR-548ai
METTL1	hsa-miR-520-3p
METTL1	hsa-miR-6384
METTL1	hsa-miR-205-3p
METTL1	hsa-miR-7222-3p
METTL1	hsa-miR-2114-3p
METTL1	hsa-miR-7152-5p
METTL1	hsa-miR-193a
METTL1	hsa-miR-889-5p
METTL1	hsa-miR-6754-5p
METTL1	hsa-miR-1207-3p
METTL1	hsa-miR-6408
METTL1	hsa-miR-7247-5p
METTL1	hsa-miR-6808-5p
METTL1	hsa-miR-3551-3p
METTL1	hsa-miR-506-3p
METTL1	hsa-miR-7184-3p
METTL1	hsa-miR-432-5p
METTL1	hsa-miR-6946-3p
METTL1	hsa-miR-466i-3p
METTL1	hsa-miR-1225-3p
METTL1	hsa-miR-320-5p
METTL1	hsa-miR-3150b-3p
METTL1	hsa-miR-1285-3p
METTL1	hsa-miR-4457
METTL1	hsa-miR-1915-3p
METTL1	hsa-miR-7054-3p
METTL1	hsa-miR-3910
METTL1	hsa-miR-2364
METTL1	hsa-miR-4795-5p
METTL1	hsa-miR-8886
METTL1	hsa-miR-4760-5p
METTL1	hsa-miR-486-5p
METTL1	hsa-miR-6760-5p
METTL1	hsa-miR-149-5p
METTL1	hsa-miR-3927-3p
METTL1	hsa-miR-130a-5p
METTL1	hsa-miR-519-5p
METTL1	hsa-miR-7051-3p
METTL1	hsa-miR-8848
METTL1	hsa-miR-4270
METTL1	hsa-miR-5125
METTL1	hsa-miR-133-5p
METTL1	hsa-miR-466c-3p
METTL1	hsa-miR-4292
METTL1	hsa-miR-3124-3p
METTL1	hsa-miR-7350-5p
METTL1	hsa-miR-887-5p
METTL1	hsa-miR-3432a
METTL1	hsa-miR-219b-5p
METTL1	hsa-miR-7340-5p
METTL1	hsa-miR-615-3p
METTL1	hsa-miR-6920-5p
METTL1	hsa-miR-7088-3p
METTL1	hsa-miR-3192-5p
METTL1	hsa-miR-2897
METTL1	hsa-miR-548ag
METTL1	hsa-miR-9500
METTL1	hsa-miR-3192
METTL1	hsa-miR-6792-5p
METTL1	hsa-miR-412-3p
METTL1	hsa-miR-3094-5p
METTL1	hsa-miR-6842-3p
METTL1	hsa-miR-17-3p
METTL1	hsa-miR-1911-3p
METTL1	hsa-miR-6507-3p
METTL1	hsa-miR-7377-3p
METTL1	hsa-miR-29b-1-5p
METTL1	hsa-miR-7398s-3p
METTL1	hsa-miR-140-3p.1
METTL1	hsa-miR-302b-5p
METTL1	hsa-miR-493
METTL1	hsa-miR-379-5p
METTL1	hsa-miR-4521
METTL1	hsa-miR-3548
METTL1	hsa-miR-412
METTL1	hsa-miR-764-5p
METTL1	hsa-miR-1200
METTL1	hsa-miR-518-5p
METTL1	hsa-miR-6826-3p
METTL1	hsa-miR-302-3p
METTL1	hsa-miR-8831
METTL1	hsa-miR-193-5p
METTL1	hsa-miR-4661-3p
METTL1	hsa-miR-485-3p
METTL1	hsa-miR-2459
METTL1	hsa-miR-1285-3p
METTL1	hsa-miR-554
METTL1	hsa-miR-1540-5p
METTL1	hsa-miR-7293-5p
METTL1	hsa-miR-7321-5p
METTL1	hsa-miR-874-3p
METTL1	hsa-miR-200c-5p
METTL1	hsa-miR-142
METTL1	hsa-miR-423-3p
METTL1	hsa-miR-8801
METTL1	hsa-miR-1277-3p
METTL1	hsa-miR-8876
METTL1	hsa-miR-6894-5p
METTL1	hsa-miR-3667-5p
METTL1	hsa-miR-188-3p
METTL1	hsa-miR-34-5p
METTL1	hsa-miR-642
METTL1	hsa-miR-124-3p.1
METTL1	hsa-miR-4639-5p
METTL1	hsa-miR-4254
METTL1	hsa-miR-3913-5p
METTL1	hsa-miR-6910-5p
METTL1	hsa-miR-1249-5p
METTL1	hsa-miR-7304-3p
METTL1	hsa-miR-2355-5p
METTL1	hsa-miR-765
METTL1	hsa-miR-3121-5p
METTL1	hsa-miR-7298-3p
METTL1	hsa-miR-693-5p
METTL1	hsa-miR-125b-2-3p
METTL1	hsa-miR-6907-5p
METTL1	hsa-miR-140-3p.2
METTL1	hsa-miR-1193-3p
METTL1	hsa-miR-570-5p
METTL1	hsa-miR-3116
METTL1	hsa-miR-192-5p
METTL1	hsa-miR-30c-2-3p
METTL1	hsa-miR-3057-3p
METTL1	hsa-miR-6795-3p
METTL1	hsa-miR-7116-3p
METTL1	hsa-miR-763
METTL1	hsa-miR-92a-2-5p
METTL1	hsa-miR-504
METTL1	hsa-miR-4693-5p
METTL1	hsa-miR-5190
METTL1	hsa-miR-6787-3p
METTL1	hsa-miR-6901-3p
METTL1	hsa-miR-3564
METTL1	hsa-miR-183-5p.2
METTL1	hsa-miR-4684-5p
METTL1	hsa-miR-6072
METTL1	hsa-miR-1470
METTL1	hsa-miR-3100-5p
METTL1	hsa-miR-548au-3p
METTL1	hsa-miR-8789
METTL1	hsa-miR-3162-5p
METTL1	hsa-miR-505-5p
METTL1	hsa-miR-4514
METTL1	hsa-miR-3589
METTL1	hsa-miR-324-3p
METTL1	hsa-miR-129-2-3p
METTL1	hsa-miR-669c-3p
METTL1	hsa-miR-7845-5p
METTL1	hsa-miR-3099-5p
METTL1	hsa-miR-3141
METTL1	hsa-miR-2450a
METTL1	hsa-miR-7069-5p
METTL1	hsa-miR-217
METTL1	hsa-miR-346-3p
METTL1	hsa-miR-455-5p
METTL1	hsa-miR-5196-5p
METTL1	hsa-miR-302d-5p
METTL1	hsa-miR-4276
METTL1	hsa-miR-497-5p
METTL1	hsa-miR-221-5p
METTL1	hsa-miR-342-3p
METTL1	hsa-miR-136-5p
METTL1	hsa-miR-5581-5p
METTL1	hsa-miR-145-5p
METTL1	hsa-miR-7019-5p
METTL1	hsa-miR-5584-5p
METTL1	hsa-miR-591
METTL1	hsa-miR-451b
METTL1	hsa-miR-924
METTL1	hsa-miR-7356-5p
METTL1	hsa-miR-7252-3p
METTL1	hsa-miR-3551-5p
METTL1	hsa-miR-2900
METTL1	hsa-miR-215-5p
METTL1	hsa-miR-7362-3p
METTL1	hsa-miR-6503-3p
METTL1	hsa-miR-4711-3p
METTL1	hsa-miR-1207
METTL1	hsa-miR-1251-3p
METTL1	hsa-miR-3569-3p
METTL1	hsa-miR-942-5p
METTL1	hsa-miR-764-3p
METTL1	hsa-miR-6982-5p
METTL1	hsa-miR-8836
METTL1	hsa-miR-92a-1-5p
METTL1	hsa-miR-8061
METTL1	hsa-miR-7250-3p
METTL1	hsa-miR-4768-5p
METTL1	hsa-miR-449c-3p
METTL1	hsa-miR-3187-5p
METTL1	hsa-miR-7652-3p
METTL1	hsa-miR-6809-3p
METTL1	hsa-miR-6858-5p
METTL1	hsa-miR-892a
METTL1	hsa-miR-8853
METTL1	hsa-miR-3058-5p
METTL1	hsa-miR-766-5p
METTL1	hsa-miR-3104-5p
METTL1	hsa-miR-4743-3p
METTL1	hsa-miR-4645-5p
METTL1	hsa-miR-466ade-3p
METTL1	hsa-miR-6125
METTL1	hsa-miR-5197-5p
METTL1	hsa-miR-6833-3p
METTL1	hsa-miR-7192-3p
METTL1	hsa-miR-373-3p
METTL1	hsa-miR-628-3p
METTL1	hsa-miR-2411-3p
METTL1	hsa-miR-467g
METTL1	hsa-miR-1952
METTL1	hsa-miR-342-5p
METTL1	hsa-miR-1545a-3p
METTL1	hsa-miR-4692
METTL1	hsa-miR-7386b-3p
METTL1	hsa-miR-133
METTL1	hsa-miR-1956-5p
METTL1	hsa-miR-330-3p
METTL1	hsa-miR-7074-5p
METTL1	hsa-miR-6131
METTL1	hsa-miR-30c-3p
METTL1	hsa-miR-6926-5p
METTL1	hsa-miR-149-3p
METTL1	hsa-miR-4747-5p
METTL1	hsa-miR-1b-5p
METTL1	hsa-miR-4667-3p
METTL1	hsa-miR-6903-5p
METTL1	hsa-miR-29a-5p
METTL1	hsa-miR-466
METTL1	hsa-miR-200b-3p
METTL1	hsa-miR-3154
METTL1	hsa-miR-6779-5p
METTL1	hsa-miR-6740-5p
METTL1	hsa-miR-338-3p
METTL1	hsa-miR-6318
METTL1	hsa-miR-207
METTL1	hsa-miR-4433b-3p
METTL1	hsa-miR-449-5p
METTL1	hsa-miR-4646-5p
METTL1	hsa-miR-151-3p
METTL1	hsa-miR-8100
METTL1	hsa-miR-7279-5p
METTL1	hsa-miR-7338-3p
METTL1	hsa-miR-1899
METTL1	hsa-miR-508-5p
METTL1	hsa-miR-206-5p
METTL1	hsa-miR-3061-5p
METTL1	hsa-miR-7356-3p
METTL1	hsa-miR-361-3p
METTL1	hsa-miR-513
METTL1	hsa-miR-7398e-3p
METTL1	hsa-miR-510-5p
METTL1	hsa-miR-4696
METTL1	hsa-miR-3074-5p
METTL1	hsa-miR-3583-3p
METTL1	hsa-miR-2428
METTL1	hsa-miR-449a
METTL1	hsa-miR-3938-3p
METTL1	hsa-miR-547-5p
METTL1	hsa-miR-4761-5p
METTL1	hsa-miR-370
METTL1	hsa-miR-615-5p
METTL1	hsa-miR-450a-1-3p
METTL1	hsa-miR-2881
METTL1	hsa-miR-576-3p
METTL1	hsa-miR-673-3p
METTL1	hsa-miR-3547-5p
METTL1	hsa-miR-5110
METTL1	hsa-miR-4668-5p
METTL1	hsa-miR-7240-5p
METTL1	hsa-miR-7372-3p
METTL1	hsa-miR-7081-5p
METTL1	hsa-miR-6837-3p
METTL1	hsa-miR-7023-5p
METTL1	hsa-miR-3106-3p
METTL1	hsa-miR-7373b-3p
METTL1	hsa-miR-21-3p
METTL1	hsa-miR-6822-5p
METTL1	hsa-miR-4689
METTL1	hsa-miR-6404
METTL1	hsa-miR-717
METTL1	hsa-miR-1956-3p
METTL1	hsa-miR-7092-5p
METTL1	hsa-miR-3605-5p
METTL1	hsa-miR-7106-5p
METTL1	hsa-miR-3689-3p
METTL1	hsa-miR-3619-5p
METTL1	hsa-miR-4286
METTL1	hsa-miR-518-3p
METTL1	hsa-miR-7192-5p
METTL1	hsa-miR-345-3p
METTL1	hsa-miR-9769-5p
METTL1	hsa-miR-324
METTL1	hsa-miR-139-3p
METTL1	hsa-miR-7383-3p
METTL1	hsa-miR-760-5p
METTL1	hsa-miR-672-3p
METTL1	hsa-miR-3085-3p
METTL1	hsa-miR-2350
METTL1	hsa-miR-4728-5p
METTL1	hsa-miR-3126-5p
METTL1	hsa-miR-8837
METTL1	hsa-miR-6891-3p
METTL1	hsa-miR-7386j-3p
METTL1	hsa-miR-23-5p
METTL1	hsa-miR-6758-3p
METTL1	hsa-miR-367-5p
METTL1	hsa-miR-6831-5p
METTL1	hsa-miR-4505
METTL1	hsa-miR-6950-5p
METTL1	hsa-miR-4647
METTL1	hsa-miR-3475-3p
METTL1	hsa-miR-7309-5p
METTL1	hsa-miR-6904-5p
METTL1	hsa-miR-7006-5p
METTL1	hsa-miR-2114-5p
METTL1	hsa-miR-2324
METTL1	hsa-miR-7318-5p
METTL1	hsa-miR-4660
METTL1	hsa-miR-520f-5p
METTL1	hsa-miR-1545c-3p
METTL1	hsa-miR-463-3p
METTL1	hsa-miR-378a-5p
METTL1	hsa-miR-196-3p
METTL1	hsa-miR-8847
METTL1	hsa-miR-5787
METTL1	hsa-miR-3613b
METTL1	hsa-miR-7150
METTL1	hsa-miR-6398
METTL1	hsa-miR-766-3p
METTL1	hsa-miR-6995-5p
METTL1	hsa-miR-29-5p
METTL1	hsa-miR-6893-5p
METTL1	hsa-miR-4426
METTL1	hsa-miR-6834-3p
METTL1	hsa-miR-124
METTL1	hsa-miR-7334-5p
METTL1	hsa-miR-679
METTL1	hsa-miR-3177-5p
METTL1	hsa-miR-192-5p
METTL1	hsa-miR-146b-3p
METTL1	hsa-miR-513b-5p
METTL1	hsa-miR-6077
METTL1	hsa-miR-1278
METTL1	hsa-miR-874-5p
METTL1	hsa-miR-7237-3p
METTL1	hsa-miR-643
METTL1	hsa-miR-7277-5p
METTL1	hsa-miR-4659b-3p
METTL1	hsa-miR-3614-3p
METTL1	hsa-miR-7217-3p
METTL1	hsa-miR-455-3p
METTL1	hsa-miR-7655-5p
METTL1	hsa-miR-539-5p
METTL1	hsa-miR-6793-5p
METTL1	hsa-miR-15
METTL1	hsa-miR-7230-5p
METTL1	hsa-miR-4433a-5p
METTL1	hsa-miR-624-3p
METTL1	hsa-miR-4324
METTL1	hsa-miR-18-3p
METTL1	hsa-miR-6890-3p
METTL1	hsa-miR-6930-5p
METTL1	hsa-miR-10b-3p
METTL1	hsa-miR-10b-5p
METTL1	hsa-miR-7154-5p
METTL1	hsa-miR-8085
METTL1	hsa-miR-517
METTL1	hsa-miR-6887-3p
METTL1	hsa-miR-30b-3p
METTL1	hsa-miR-3064-3p
METTL1	hsa-miR-367-3p
METTL1	hsa-miR-6807-5p
METTL1	hsa-miR-4459
METTL1	hsa-miR-6405
METTL1	hsa-miR-7685-5p
METTL1	hsa-miR-362-3p
METTL1	hsa-miR-2330-3p
METTL1	hsa-miR-450a-2-3p
METTL1	hsa-miR-4446-5p
METTL1	hsa-miR-508b
METTL1	hsa-miR-186-3p
METTL1	hsa-miR-470-5p
METTL1	hsa-miR-6736-3p
METTL1	hsa-miR-223-3p
METTL1	hsa-miR-188-5p
METTL1	hsa-miR-4789-3p
METTL1	hsa-miR-7119-5p
METTL1	hsa-miR-1913
METTL1	hsa-miR-7050-3p
METTL1	hsa-miR-6984-3p
METTL1	hsa-miR-6754-3p
METTL1	hsa-miR-7847-3p
METTL1	hsa-miR-940
METTL1	hsa-miR-885-5p
METTL1	hsa-miR-2385-5p
METTL1	hsa-miR-670-3p
METTL1	hsa-miR-4697-3p
METTL1	hsa-miR-6739-5p
METTL1	hsa-miR-7197-3p
METTL1	hsa-miR-194-1-3p
METTL1	hsa-miR-4727-5p
METTL1	hsa-miR-1905
METTL1	hsa-miR-1251-5p
METTL1	hsa-miR-6529-5p
METTL1	hsa-miR-6517
METTL1	hsa-miR-8866
METTL1	hsa-miR-193b-5p
METTL1	hsa-miR-7196-3p
METTL1	hsa-miR-7270-3p
METTL1	hsa-miR-2902
METTL1	hsa-miR-4673
METTL1	hsa-miR-7038-3p
METTL1	hsa-miR-8812
METTL1	hsa-miR-466f-3p
METTL1	hsa-miR-429
METTL1	hsa-miR-7018-3p
METTL1	hsa-miR-8808
METTL1	hsa-miR-7319-5p
METTL1	hsa-miR-2339
METTL1	hsa-miR-769
METTL1	hsa-miR-6878-5p
METTL1	hsa-miR-6731-5p
METTL1	hsa-miR-329
METTL1	hsa-miR-2363
METTL1	hsa-miR-3652
METTL1	hsa-miR-5193
METTL1	hsa-miR-7244-5p
METTL1	hsa-miR-7307-3p
METTL1	hsa-miR-214-3p
METTL1	hsa-miR-185-5p
METTL1	hsa-miR-6366
METTL1	hsa-miR-216b-3p
METTL1	hsa-miR-1957a
METTL1	hsa-miR-384-5p
METTL1	hsa-miR-642a-5p
METTL1	hsa-miR-544b
METTL1	hsa-miR-3092-3p
METTL1	hsa-miR-4666a-5p
METTL1	hsa-miR-6785-5p
METTL1	hsa-miR-4298
METTL1	hsa-miR-7354-3p
METTL1	hsa-miR-7023-3p
METTL1	hsa-miR-152-5p
METTL1	hsa-miR-4433b-5p
METTL1	hsa-miR-8060
METTL1	hsa-miR-550a-3p
METTL1	hsa-miR-873-3p
METTL1	hsa-miR-6938-3p
METTL1	hsa-miR-6959-5p
METTL1	hsa-miR-34
METTL1	hsa-miR-7-5p
METTL1	hsa-miR-874
METTL1	hsa-miR-4308
METTL1	hsa-miR-8818
METTL1	hsa-miR-6909-5p
METTL1	hsa-miR-7684-5p
METTL1	hsa-miR-129b-5p
METTL1	hsa-miR-7035-3p
METTL1	hsa-miR-3138
METTL1	hsa-miR-3658
METTL1	hsa-miR-605-3p
METTL1	hsa-miR-7261-5p
METTL1	hsa-miR-5189-5p
METTL1	hsa-miR-2387
METTL1	hsa-miR-4726-3p
METTL1	hsa-miR-5087
METTL1	hsa-miR-193a-5p
METTL1	hsa-miR-194-3p
METTL1	hsa-miR-5108
METTL1	hsa-miR-8845
METTL1	hsa-miR-7289-5p
METTL1	hsa-miR-519-3p
METTL1	hsa-miR-148-5p
METTL1	hsa-miR-939-3p
METTL1	hsa-miR-627-3p
METTL1	hsa-miR-4704-3p
METTL1	hsa-miR-328
METTL1	hsa-miR-3591-3p
METTL1	hsa-miR-139-5p
METTL1	hsa-miR-204-3p
METTL1	hsa-miR-7211-5p
METTL1	hsa-miR-6799-5p
METTL1	hsa-miR-6979-5p
METTL1	hsa-miR-510
METTL1	hsa-miR-338-3p
METTL1	hsa-miR-7386l-3p
METTL1	hsa-miR-7160-5p
METTL1	hsa-miR-5004-5p
METTL1	hsa-miR-194-2-3p
METTL1	hsa-miR-2895
METTL1	hsa-miR-16-5p
METTL1	hsa-miR-4662b
METTL1	hsa-miR-8908-5p
METTL1	hsa-miR-1193
METTL1	hsa-miR-1-3p
METTL1	hsa-miR-370-3p
METTL1	hsa-miR-6372
METTL1	hsa-miR-8904b
METTL1	hsa-miR-297bc-3p
METTL1	hsa-miR-5001-3p
METTL1	hsa-miR-2451
METTL1	hsa-miR-6738-3p
METTL1	hsa-miR-6860
METTL1	hsa-miR-145-5p
METTL1	hsa-miR-5680
METTL1	hsa-miR-2449
METTL1	hsa-miR-146
METTL1	hsa-miR-7854-3p
METTL1	hsa-miR-466b-2-3p
METTL1	hsa-miR-466bcp-3p
METTL1	hsa-miR-299-3p
METTL1	hsa-miR-8841
METTL1	hsa-miR-7059-5p
METTL1	hsa-miR-1248
METTL1	hsa-miR-4652-3p
METTL1	hsa-miR-6750-5p
METTL1	hsa-miR-3153
METTL1	hsa-miR-6958-5p
METTL1	hsa-miR-4251
METTL1	hsa-miR-7976
METTL1	hsa-miR-4659a-3p
METTL1	hsa-miR-4733-5p
METTL1	hsa-miR-532-3p
METTL1	hsa-miR-191-3p
METTL1	hsa-miR-1273h-5p
METTL1	hsa-miR-1-5p
METTL1	hsa-miR-8905
METTL1	hsa-miR-6951-3p
METTL1	hsa-miR-30-3p
METTL1	hsa-miR-6991-3p
METTL1	hsa-miR-30-5p
METTL1	hsa-miR-6840-3p
METTL1	hsa-miR-769-3p
METTL1	hsa-miR-2447
METTL1	hsa-miR-486-5p
METTL1	hsa-miR-4297
METTL1	hsa-miR-3173-5p
METTL1	hsa-miR-6515-5p
METTL1	hsa-miR-7035-5p
METTL1	hsa-miR-6914-5p
METTL1	hsa-miR-204-5p
METTL1	hsa-miR-6875-3p
METTL1	hsa-miR-181-5p
METTL1	hsa-miR-6720-5p
METTL1	hsa-miR-7056-5p
METTL1	hsa-miR-1254
METTL1	hsa-miR-612
METTL1	hsa-miR-6980-5p
METTL1	hsa-miR-661
METTL1	hsa-miR-7864
METTL1	hsa-miR-3145-5p
METTL1	hsa-miR-3064-5p
METTL1	hsa-miR-576-5p
METTL1	hsa-miR-7286-3p
METTL1	hsa-miR-2360
METTL1	hsa-miR-483-3p
METTL1	hsa-miR-146-5p
METTL1	hsa-miR-6917-3p
METTL1	hsa-miR-342-3p
METTL1	hsa-miR-6972-5p
METTL1	hsa-miR-376a-1-5p
METTL1	hsa-miR-5046
METTL1	hsa-miR-664-5p
METTL1	hsa-miR-499
METTL1	hsa-miR-6733-5p
METTL1	hsa-miR-4650-3p
METTL1	hsa-miR-4441
METTL1	hsa-miR-6974-3p
METTL1	hsa-miR-6969-5p
METTL1	hsa-miR-7024-5p
METTL1	hsa-miR-1976
METTL1	hsa-miR-466b-4-3p
METTL1	hsa-miR-1224-3p
METTL1	hsa-miR-1251
METTL1	hsa-miR-7068-3p
METTL1	hsa-miR-3122
METTL1	hsa-miR-3097-3p
METTL1	hsa-miR-548ba
METTL1	hsa-miR-504-3p
METTL1	hsa-miR-7055-5p
METTL1	hsa-miR-150-3p
METTL1	hsa-miR-216a-3p
METTL1	hsa-miR-3135a
METTL1	hsa-miR-7386e-3p
METTL1	hsa-miR-4451
METTL1	hsa-miR-7011-5p
METTL1	hsa-miR-10b-5p
METTL1	hsa-miR-7170-3p
METTL1	hsa-miR-1953
METTL1	hsa-miR-6368
METTL1	hsa-miR-7009-5p
METTL1	hsa-miR-6788-5p
METTL1	hsa-miR-630
METTL1	hsa-miR-6929-5p
METTL1	hsa-miR-96-5p
METTL1	hsa-miR-8857
METTL1	hsa-miR-6936-5p
METTL1	hsa-miR-2894
METTL1	hsa-miR-7678-3p
METTL1	hsa-miR-1226-3p
METTL1	hsa-miR-329-3p
METTL1	hsa-miR-7066-5p
METTL1	hsa-miR-467f
METTL1	hsa-miR-27-3p
METTL1	hsa-miR-4695-3p
METTL1	hsa-miR-1267
METTL1	hsa-miR-466mo-3p
METTL1	hsa-miR-7154-3p
METTL1	hsa-miR-2411-5p
METTL1	hsa-miR-215
METTL1	hsa-miR-3927-3p
METTL1	hsa-miR-378d
METTL1	hsa-miR-31-5p
METTL1	hsa-miR-2442
METTL1	hsa-miR-2486-5p
METTL1	hsa-miR-4274
METTL1	hsa-miR-1277-3p
METTL1	hsa-miR-3075-5p
METTL1	hsa-miR-1982-5p
METTL1	hsa-miR-544a
METTL1	hsa-miR-539-5p
METTL1	hsa-miR-8791
METTL1	hsa-miR-6523a
METTL1	hsa-miR-1840
METTL1	hsa-miR-7688-3p
METTL1	hsa-miR-379-5p
METTL1	hsa-miR-540-3p
METTL1	hsa-miR-4323
METTL1	hsa-miR-6791-5p
METTL1	hsa-miR-1302
METTL1	hsa-miR-936
METTL1	hsa-miR-7185-5p
METTL1	hsa-miR-7385a-3p
METTL1	hsa-miR-202-3p
METTL1	hsa-miR-1843
METTL1	hsa-miR-6721-5p
METTL1	hsa-miR-101-1-5p
METTL1	hsa-miR-624-3p
METTL1	hsa-miR-124-3p.2
METTL1	hsa-miR-128-3p
METTL1	hsa-miR-211-5p
METTL1	hsa-miR-6883-5p
METTL1	hsa-miR-466b-5p
METTL1	hsa-miR-759
METTL1	hsa-miR-651-3p
METTL1	hsa-miR-185-5p
METTL1	hsa-miR-7260-3p
METTL1	hsa-miR-4530
METTL1	hsa-miR-30--3p
METTL1	hsa-miR-712-5p
METTL1	hsa-miR-7091-5p
METTL1	hsa-miR-3593-5p
METTL1	hsa-miR-372-3p
METTL1	hsa-miR-145-3p
METTL1	hsa-miR-7277-3p
METTL1	hsa-miR-195-5p
METTL1	hsa-miR-6780a-5p
METTL1	hsa-miR-6134
METTL1	hsa-miR-4680
METTL1	hsa-miR-3584-5p
METTL1	hsa-miR-4428
METTL1	hsa-miR-452-3p
METTL1	hsa-miR-8796
METTL1	hsa-miR-186-5p
METTL1	hsa-miR-511-3p
METTL1	hsa-miR-6513-5p
METTL1	hsa-miR-4797-3p
METTL1	hsa-miR-6356
METTL1	hsa-miR-1239
METTL1	hsa-miR-3083-5p
METTL1	hsa-miR-4264
METTL1	hsa-miR-1285-5p
METTL1	hsa-miR-181a-2-3p
METTL1	hsa-miR-4643
METTL1	hsa-miR-7216-5p
METTL1	hsa-miR-450b-3p
METTL1	hsa-miR-6941-5p
METTL1	hsa-miR-4430
METTL1	hsa-miR-766-3p
METTL1	hsa-miR-6797-5p
METTL1	hsa-miR-2392
METTL1	hsa-miR-6902-5p
METTL1	hsa-miR-136-5p
METTL1	hsa-miR-6362
METTL1	hsa-miR-6794-3p
METTL1	hsa-miR-378-5p
METTL1	hsa-miR-6764-5p
METTL1	hsa-miR-7382-5p
WDR4	hsa-miR-5571-3p
WDR4	hsa-miR-4672
WDR4	hsa-miR-7-3p
WDR4	hsa-miR-3148
WDR4	hsa-miR-942-3p
WDR4	hsa-miR-363-3p
WDR4	hsa-miR-1285-5p
WDR4	hsa-miR-5683
WDR4	hsa-miR-7975
WDR4	hsa-miR-6784-3p
WDR4	hsa-miR-6874-5p
WDR4	hsa-miR-199-3p
WDR4	hsa-miR-222-5p
WDR4	hsa-miR-421
WDR4	hsa-miR-1306-3p
WDR4	hsa-miR-936
WDR4	hsa-miR-367-3p
WDR4	hsa-miR-6716-3p
WDR4	hsa-miR-548g-3p
WDR4	hsa-miR-495-3p
WDR4	hsa-miR-377-3p
WDR4	hsa-miR-4716-5p
WDR4	hsa-miR-8082
WDR4	hsa-miR-6792-5p
WDR4	hsa-miR-185-3p
WDR4	hsa-miR-221-3p
WDR4	hsa-miR-6847-5p
WDR4	hsa-miR-4797-3p
WDR4	hsa-miR-485
WDR4	hsa-miR-7846-3p
WDR4	hsa-miR-1229-3p
WDR4	hsa-miR-495-3p
WDR4	hsa-miR-302b-5p
WDR4	hsa-miR-188-3p
WDR4	hsa-miR-3613-3p
WDR4	hsa-miR-203b-5p
WDR4	hsa-miR-32-5p
WDR4	hsa-miR-216b-3p
WDR4	hsa-miR-4534
WDR4	hsa-miR-4633-3p
WDR4	hsa-miR-4283
WDR4	hsa-miR-6500-5p
WDR4	hsa-miR-222-3p
WDR4	hsa-miR-4495
WDR4	hsa-miR-2467-3p
WDR4	hsa-miR-4699-3p
WDR4	hsa-miR-342-3p
WDR4	hsa-miR-6511-3p
WDR4	hsa-miR-4802-3p
WDR4	hsa-miR-27a-5p
WDR4	hsa-miR-3129-5p
WDR4	hsa-miR-4665-3p
WDR4	hsa-miR-4804-3p
WDR4	hsa-miR-7198-3p
WDR4	hsa-miR-543-3p
WDR4	hsa-miR-3914
WDR4	hsa-miR-6862-3p
WDR4	hsa-miR-505-3p
WDR4	hsa-miR-4448
WDR4	hsa-miR-1323-5p
WDR4	hsa-miR-4282
WDR4	hsa-miR-221-3p
WDR4	hsa-miR-596
WDR4	hsa-miR-222-3p
WDR4	hsa-miR-140-3p.1
WDR4	hsa-miR-1908-3p
WDR4	hsa-miR-384
WDR4	hsa-miR-28-3p
WDR4	hsa-miR-4733-5p
WDR4	hsa-miR-4326
WDR4	hsa-miR-582-5p
WDR4	hsa-miR-6772-3p
WDR4	hsa-miR-9-5p
WDR4	hsa-miR-5582-3p
WDR4	hsa-miR-92-3p
WDR4	hsa-miR-5004-5p
WDR4	hsa-miR-6768-5p
WDR4	hsa-miR-3675-5p
WDR4	hsa-miR-6718-5p
WDR4	hsa-miR-4489
WDR4	hsa-miR-216a-5p
WDR4	hsa-miR-302d-5p
WDR4	hsa-miR-25-3p
WDR4	hsa-miR-7186-3p
WDR4	hsa-miR-4268
WDR4	hsa-miR-194-5p
WDR4	hsa-miR-196b-3p
WDR4	hsa-miR-1323
